# Supplementary material for: Cu2+ induced formation of Au44(SC2H4Ph)32 and its high catalytic activity for the reduction of 4-nitrophenol at low temperature
Source: Royal Society of Chemistry journal article supplement (doi:10.1039/c4cc08830a), 2015-01-01
Supplement: c4cc08830a1.pdf [file c4cc08830a1.pdf]

## Supporting Information

### **Cu<sup>2+</sup> Induced Formation of Au<sub>44</sub>(SC<sub>2</sub>H<sub>4</sub>Ph)<sub>32</sub> and Its High Catalytic Activity for the Reduction of 4-Nitrophenol at Low Temperature**

Man-Bo Li,<sup>a</sup> Shi-Kai Tian,<sup>b</sup> Zhikun Wu<sup>\*,a</sup> and Rongchao Jin<sup>\*,c</sup>

<sup>a</sup> Key Laboratory of Materials Physics, Anhui Key Laboratory of Nanomaterials and Nanostructures, Institute of Solid State Physics, Chinese Academy of Sciences, Hefei 230031, China

<sup>b</sup> Department of Chemistry, University of Science and Technology of China, Hefei, Anhui 230026, China

<sup>c</sup> Department of Chemistry, Carnegie Mellon University, Pittsburgh, Pennsylvania 15213, United States  
E-mail: zkwu@issp.ac.cn; rongchao@andrew.cmu.edu.

#### **General information**

All the chemicals and reagents were commercially available. UV-Vis measurements were conducted on a Shimadzu UV-2550 spectrophotometer. Electrospray ionization mass spectra (ESI-MS) were acquired on a Waters Q-TOF mass spectrometer equipped with a Z-spray source. The sample was dissolved in toluene (~1 mg/ml) and diluted 1:1 in dry ethanol (5 mM CsOAc). The sample was directly infused at 5  $\mu$ L/min. The source temperature was fixed at 70 °C. The spray voltage was set at 2.20 kV and the cone voltage at 60V. Matrix-assisted laser desorption/ionization time of flight mass spectrometry (MOLDI-TOF-MS) was performed on a Bruker Autoflex Speed MALDI-TOF/TOF instrument using DCTB (*trans*-2-[3-(4-*tert*-Butylphenyl)-2-methyl-2-propenylidene] malononitrile) as the matrix. Thermal gravimetric analysis (TGA) was conducted in a N<sub>2</sub> atmosphere (flow rate ~ 50 mL/min) on a TG/DAT 6300 analyzer (Seiko Instruments, Inc), and the heating rate was 10 °C/min. X-ray Photoelectron Spectroscopy (XPS) measurements were conducted on an ESCALAB 250Xi XPS spectrometer (Thermo Scientific, America) using a monochromatized Al K <sub>$\alpha$</sub>  source and equipped with an Ar<sup>+</sup> ion sputtering gun. All binding energies were calibrated using the C (1s) carbon peak (284.8 eV). Transmission electron microscopy (TEM) images for Au<sub>44</sub>(SCH<sub>2</sub>CH<sub>2</sub>Ph)<sub>32</sub> were taken by JEOL2010. The operating voltage on the microscope was 200 kV. Elemental analysis (EA) was performed on Elementar vario EL cube (Elementar, Germany). Atomic absorption spectroscopy (AAS) was performed on Perkin Elmer AA800 atomic absorption spectrometer. <sup>1</sup>H NMR spectra were recorded on a Bruker AC-400 FT spectrometer (400 MHz) using tetramethylsilane as an internal reference. NMR multiplicities are abbreviated as follows: s = singlet, m = multiplet. Chemical shifts ( $\delta$ ) were expressed in ppm. Au<sub>25</sub>(SCH<sub>2</sub>CH<sub>2</sub>Ph)<sub>18</sub>,<sup>s1</sup> Au<sub>38</sub>(SCH<sub>2</sub>CH<sub>2</sub>Ph)<sub>24</sub>,<sup>s2</sup> Au<sub>44</sub>(TBBT)<sub>28</sub>,<sup>s3</sup> Au<sub>144</sub>(SCH<sub>2</sub>CH<sub>2</sub>Ph)<sub>60</sub>,<sup>s4</sup> Ni<sub>6</sub>(SC<sub>2</sub>H<sub>4</sub>Ph)<sub>12</sub>,<sup>s5</sup> Ag<sub>152</sub>(SC<sub>2</sub>H<sub>4</sub>Ph)<sub>60</sub>,<sup>s6</sup> Co nanoparticle<sup>s5</sup> and Cu nanoparticle<sup>s5</sup> were synthesized following the previous methods.

#### **Synthesis of Au<sub>44</sub>(SCH<sub>2</sub>CH<sub>2</sub>Ph)<sub>32</sub>**

2.0 equivalent of Cu(NO<sub>3</sub>)<sub>2</sub>·3H<sub>2</sub>O (2.41 mg, 0.010 mmol) dissolved in CH<sub>3</sub>CN (0.5 mL) was added to a solution of Au<sub>25</sub>(SC<sub>2</sub>H<sub>4</sub>Ph)<sub>18</sub><sup>-</sup>TOA<sup>+</sup> (39.3 mg, 0.005 mmol) in 5.0 mL of CH<sub>2</sub>Cl<sub>2</sub>

dropwise over a period of 10 minutes at room temperature. The reaction process was monitored by UV-vis. After being stirred at room temperature for 12 h, the reaction mixture was stopped by the addition of a large amount of CH<sub>3</sub>OH. The separated solids were washed by excess CH<sub>3</sub>OH for at least three times. Tiny brown pellets were collected after crystallization from CH<sub>2</sub>Cl<sub>2</sub>/CH<sub>3</sub>OH = 1/1 solution (29.0 mg, ~ 75% yield).

### **Three control experiments to probe the role of Cu<sup>2+</sup>**

First, other oxidant (eg: H<sub>2</sub>O<sub>2</sub>) instead of Cu(II) was employed to oxidate Au<sub>25</sub><sup>-</sup>, and it was found that Au<sub>25</sub><sup>+</sup> can't be converted to Au<sub>44</sub> in the presence of H<sub>2</sub>O<sub>2</sub> after 12 h. (Figure S 6A). Secondly, isolated Au<sub>25</sub><sup>+</sup> (from Au<sub>25</sub>-Cu<sup>2+</sup> system) was dissolved in DCM and the resulting solution was stirred at room temperature for 12 h, but no Au<sub>44</sub> clusters was detected (Figure S 6B). Thirdly, isolated Au<sub>25</sub><sup>+</sup> (from Au<sub>25</sub>-Cu<sup>2+</sup> system) and 0.5 equivalent of Cu (II) were mixed in DCM and stirred at room temperature for 12 h. Obviously the UV/Vis/NIR spectrum indicated the formation of Au<sub>44</sub> clusters (Figure S 6C). Taken together, these experimental results unambiguously demonstrate that Cu (II) ion not only acts as an oxidant, but also plays important roles in the subsequent decomposition and recombination steps.

### **General procedure for the fractional isolation of reaction mixture and re-exposure to reaction conditions:**

2.0 equivalent of Cu(NO<sub>3</sub>)<sub>2</sub>·3H<sub>2</sub>O (2.41 mg, 0.010 mmol) dissolved in CH<sub>3</sub>CN (0.5 mL) was added to a solution of Au<sub>25</sub>(SC<sub>2</sub>H<sub>4</sub>Ph)<sub>18</sub><sup>-</sup>TOA<sup>+</sup> (39.3 mg, 0.005 mmol) in 5.0 mL of CH<sub>2</sub>Cl<sub>2</sub> over a period of 10 minutes at room temperature. The mixture was stirred at room temperature for 3 h. A large amount of petroleum ether was added to the mixture and the resulting precipitates were separated from the supernatant by centrifugation. The obtained precipitates were dissolved with DCM (1.0 mL) and three fractions were isolated after stepwise precipitation by the use of methanol. After that, these three fractions were dissolved in DCM (5.0 mL) respectively and 0.5 equivalent of Cu(NO<sub>3</sub>)<sub>2</sub>·3H<sub>2</sub>O (0.60 mg, 0.0025 mmol) was added into every fraction. These mixtures were stirred at room temperature for 12 h.

### **General procedure for the reduction of 4-nitrophenol catalyzed by nanoclusters**

The clusters used were as a homogeneous solution, and they were not adsorbed on support or calcinated. The catalytic reactions were performed under atmospheric conditions. 4-nitrophenol (69.5 mg, 0.5 mmol) and the nanocluster catalyst (0.1 mol% or 1 mol%) were dissolved in 5 mL THF at 0 or 25 °C. The solution was stirred for 5 min. NaBH<sub>4</sub> (189 mg, 5.0 mmol) dissolved in 1.0 mL H<sub>2</sub>O was added slowly to the reaction solution. The mixture was stirred at 0 or 25 °C for 30 min or 5 min. After that, a large amount of water was added to quench the reaction. The mixture was extracted with ethyl acetate (2 × 20 mL) and the combined organic layers were dried over anhydrous sodium sulfate, then concentrated. The residue was purified by preparative thin layer chromatography, developing with ethyl acetate/petroleum ether = 1/5 to afford the reduction product.

**Analytical Data for the product (4-aminophenol)**

White solid, m.p. 185-186°C;  $^1\text{H}$  NMR (400 MHz, acetone- $d_6$ )  $\delta$  7.44 (s, 1H), 6.62-6.50 (m, 4H), 4.06 (s, 2H); HRMS (ESI) calcd for  $\text{C}_6\text{H}_8\text{NO}$  ( $\text{M}+\text{H}$ ) $^+$  110.0606, found 110.0594.

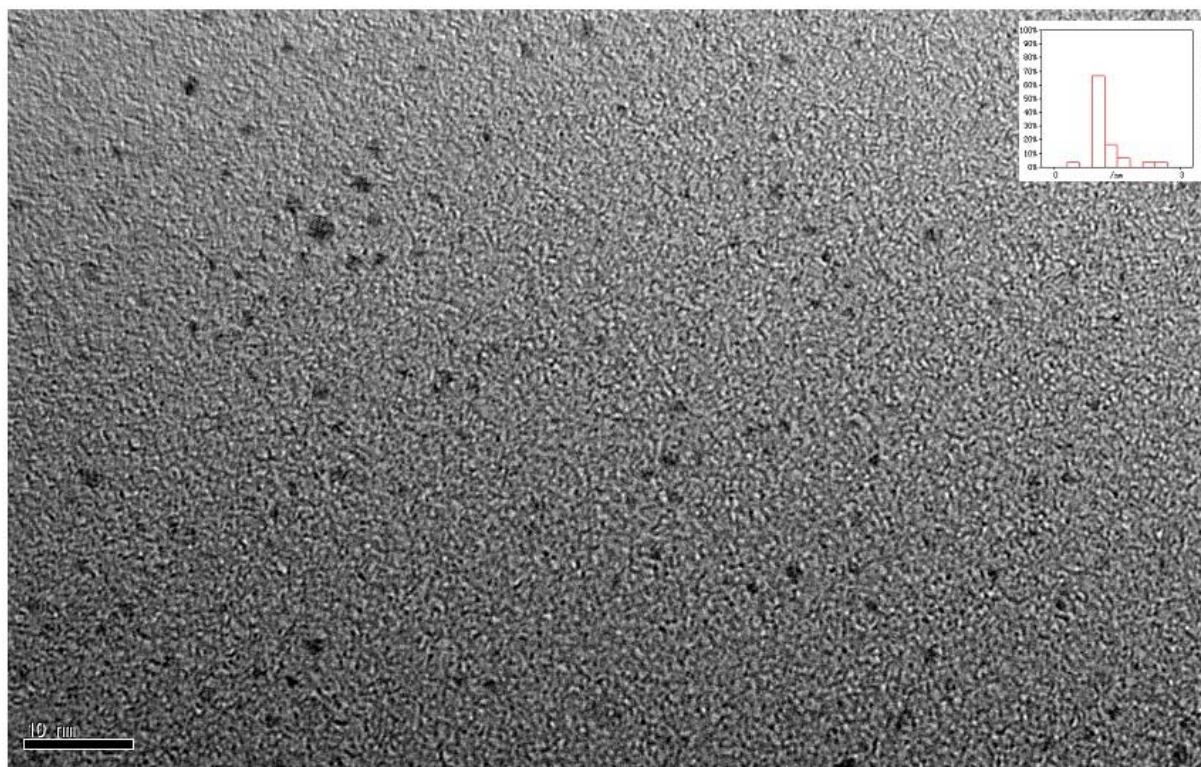

**Figure S1.** TEM imaging of  $\text{Au}_{44}(\text{SC}_2\text{H}_4\text{Ph})_{32}$  (Inset is the size distribution histogram. Scale bar: 10 nm)

**Table S1.** Mass calculation of  $\text{Au}_x(\text{SC}_2\text{H}_4\text{Ph})_y$  with candidate  $x$  and  $y$  values (exp. MW=13057.94, based on ESI-MS).

| $x$ (Au) | $y$ (SR) | MW(cal.) | Deviation | $x$ (Au) | $y$ (SR) | MW(cal.) | Deviation |
|----------|----------|----------|-----------|----------|----------|----------|-----------|
| 38       | 40       | 12973.61 | -84.33    | 38       | 41       | 13110.83 | 52.89     |
| 39       | 39       | 13033.36 | -24.58    | 39       | 40       | 13170.58 | 112.64    |
| 40       | 37       | 12955.88 | -102.06   | 40       | 38       | 13093.10 | 35.16     |
| 41       | 36       | 13015.62 | -42.32    | 41       | 37       | 13152.84 | 94.9      |
| 42       | 34       | 12938.15 | -119.79   | 42       | 35       | 13075.37 | 17.43     |
| 43       | 33       | 12997.89 | -60.05    | 43       | 34       | 13135.11 | 77.17     |
| 44       | 32       | 13057.90 | -0.04     | 44       | 33       | 13194.86 | 136.92    |
| 45       | 30       | 12980.16 | -77.78    | 45       | 31       | 13117.38 | 59.44     |
| 46       | 29       | 13039.90 | -18.04    | 46       | 30       | 13177.12 | 119.18    |
| 47       | 27       | 12962.42 | -95.52    | 47       | 28       | 13099.65 | 41.71     |

|    |    |          |        |    |    |          |        |
|----|----|----------|--------|----|----|----------|--------|
| 48 | 26 | 13022.17 | -35.77 | 48 | 27 | 13159.39 | 101.45 |
|----|----|----------|--------|----|----|----------|--------|

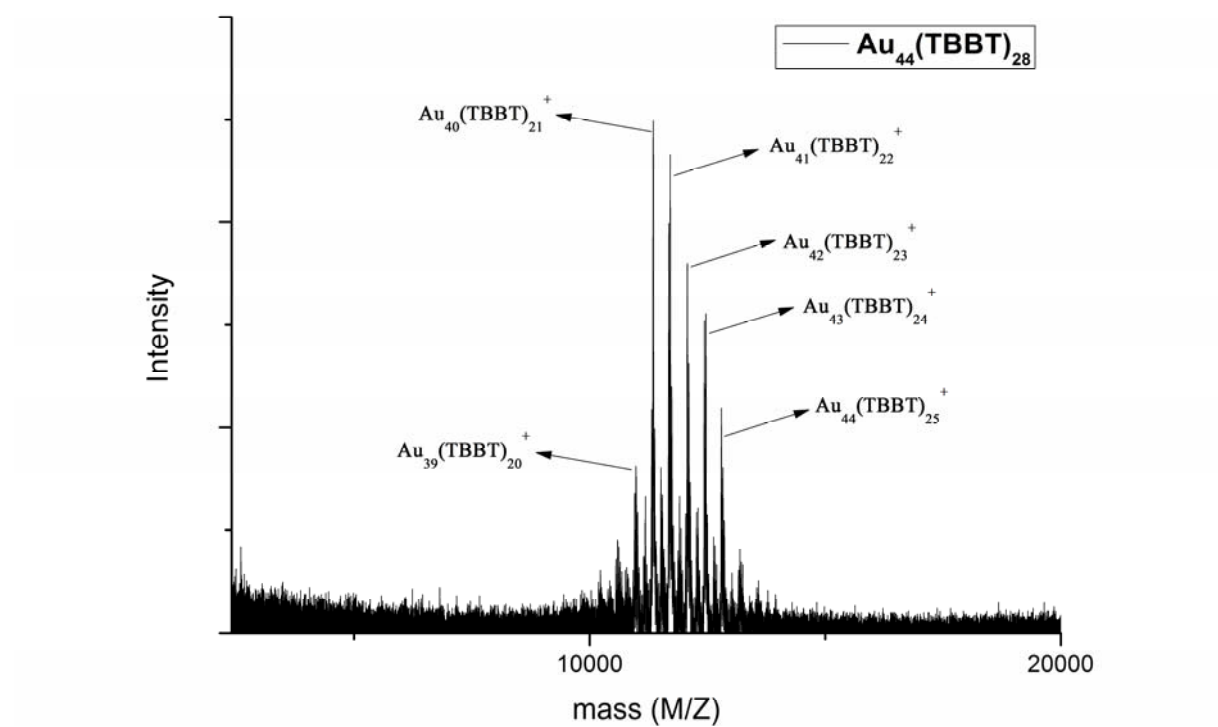

**Figure S2.** MALDI-TOF-MS spectrum of  $\text{Au}_{44}(\text{TBBT})_{28}$

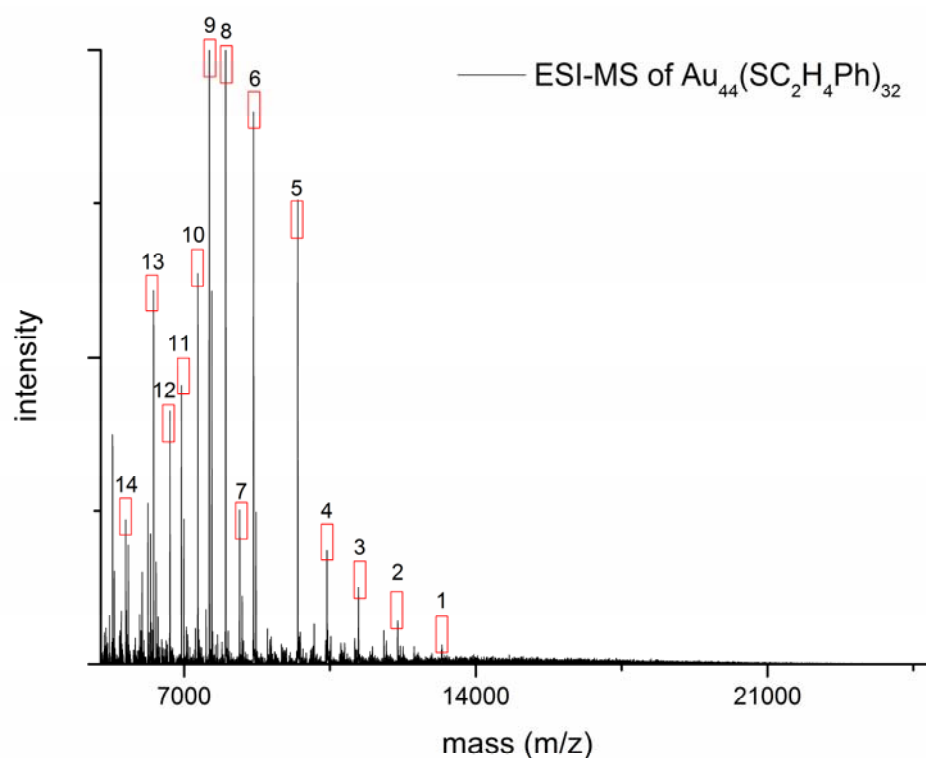

**Figure S3.** Full scale mass spectrum of  $\text{Au}_{44}(\text{SC}_2\text{H}_4\text{Ph})_{32}$

**Table S2.** Assignments of peaks in ESI-MS spectrum (see Figure S3).

| Entry | Assignment                                                         | Experimental value | Calculated value | Deviation |
|-------|--------------------------------------------------------------------|--------------------|------------------|-----------|
| 1     | $[\text{Au}_{44}(\text{SC}_2\text{H}_4\text{Ph})_{32}\text{Cs}]^+$ | 13190.85           | 13190.81         | -0.04     |
| 2     | $[\text{Au}_{40}(\text{SC}_2\text{H}_4\text{Ph})_{30}\text{Cs}]^+$ | 12129.17           | 12128.86         | -0.31     |
| 3     | $[\text{Au}_{38}(\text{SC}_2\text{H}_4\text{Ph})_{26}\text{Cs}]^+$ | 11184.91           | 11185.75         | 0.84      |
| 4     | $[\text{Au}_{34}(\text{SC}_2\text{H}_4\text{Ph})_{26}\text{Cs}]^+$ | 10398.30           | 10397.89         | -0.41     |
| 5     | $[\text{Au}_{32}(\text{SC}_2\text{H}_4\text{Ph})_{24}\text{Cs}]^+$ | 9729.12            | 9729.86          | 0.74      |
| 6     | $[\text{Au}_{28}(\text{SC}_2\text{H}_4\text{Ph})_{22}\text{Cs}]^+$ | 8667.11            | 8666.92          | -0.19     |
| 7     | $[\text{Au}_{27}(\text{SC}_2\text{H}_4\text{Ph})_{21}\text{Cs}]^+$ | 8332.14            | 8332.90          | 0.76      |
| 8     | $[\text{Au}_{26}(\text{SC}_2\text{H}_4\text{Ph})_{20}\text{Cs}]^+$ | 7998.10            | 7998.89          | 0.79      |
| 9     | $[\text{Au}_{24}(\text{SC}_2\text{H}_4\text{Ph})_{20}\text{Cs}]^+$ | 7604.15            | 7604.96          | 0.81      |
| 10    | $[\text{Au}_{24}(\text{SC}_2\text{H}_4\text{Ph})_{18}\text{Cs}]^+$ | 7329.11            | 7329.88          | 0.77      |
| 11    | $[\text{Au}_{22}(\text{SC}_2\text{H}_4\text{Ph})_{18}\text{Cs}]^+$ | 6935.12            | 6935.94          | 0.82      |
| 12    | $[\text{Au}_{22}(\text{SC}_2\text{H}_4\text{Ph})_{16}\text{Cs}]^+$ | 6661.07            | 6661.86          | 0.79      |
| 13    | $[\text{Au}_{20}(\text{SC}_2\text{H}_4\text{Ph})_{16}\text{Cs}]^+$ | 6267.08            | 6267.92          | 0.84      |
| 14    | $[\text{Au}_{18}(\text{SC}_2\text{H}_4\text{Ph})_{14}\text{Cs}]^+$ | 5599.06            | 5599.91          | 0.85      |

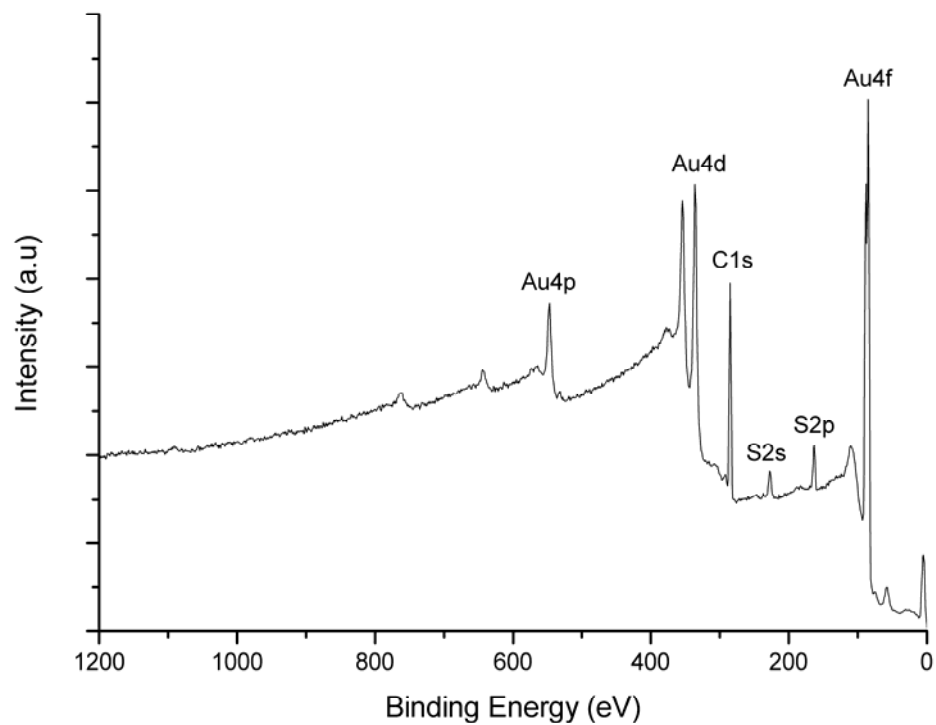

**Figure S4.** XPS survey spectrum of  $\text{Au}_{44}(\text{SC}_2\text{H}_4\text{Ph})_{32}$

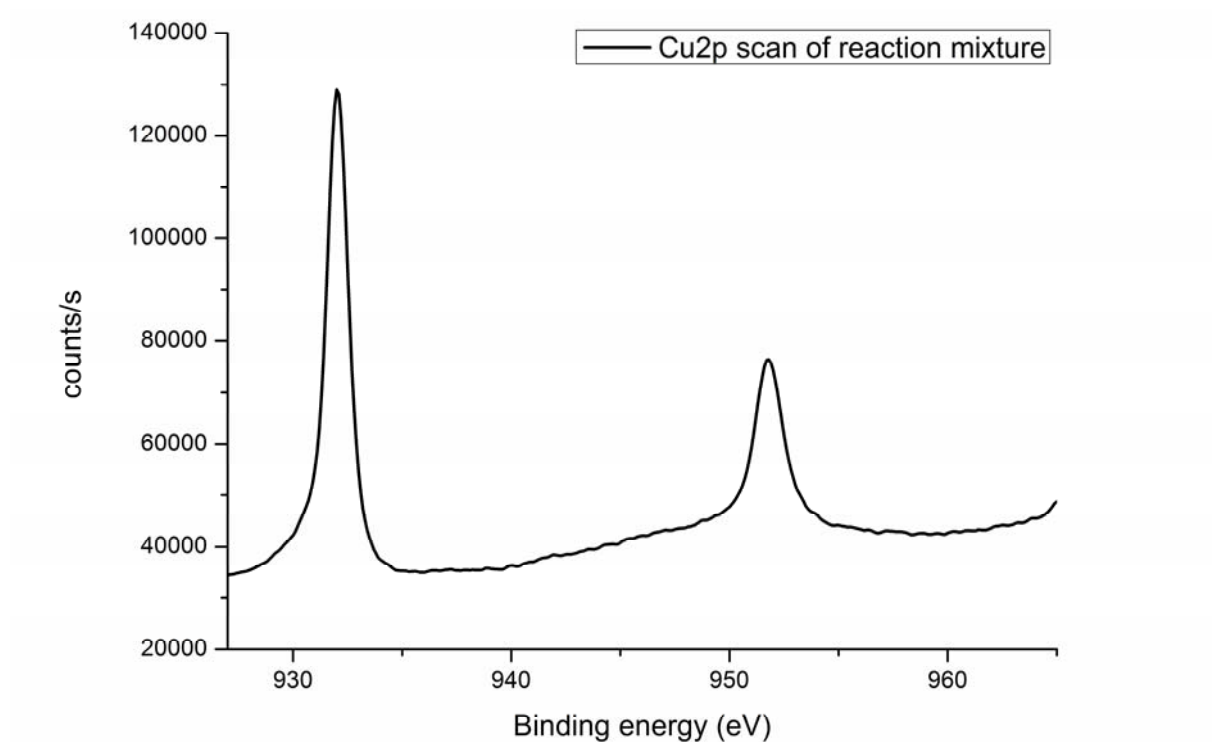

**Figure S5.** XPS spectrum of the reaction mixture.

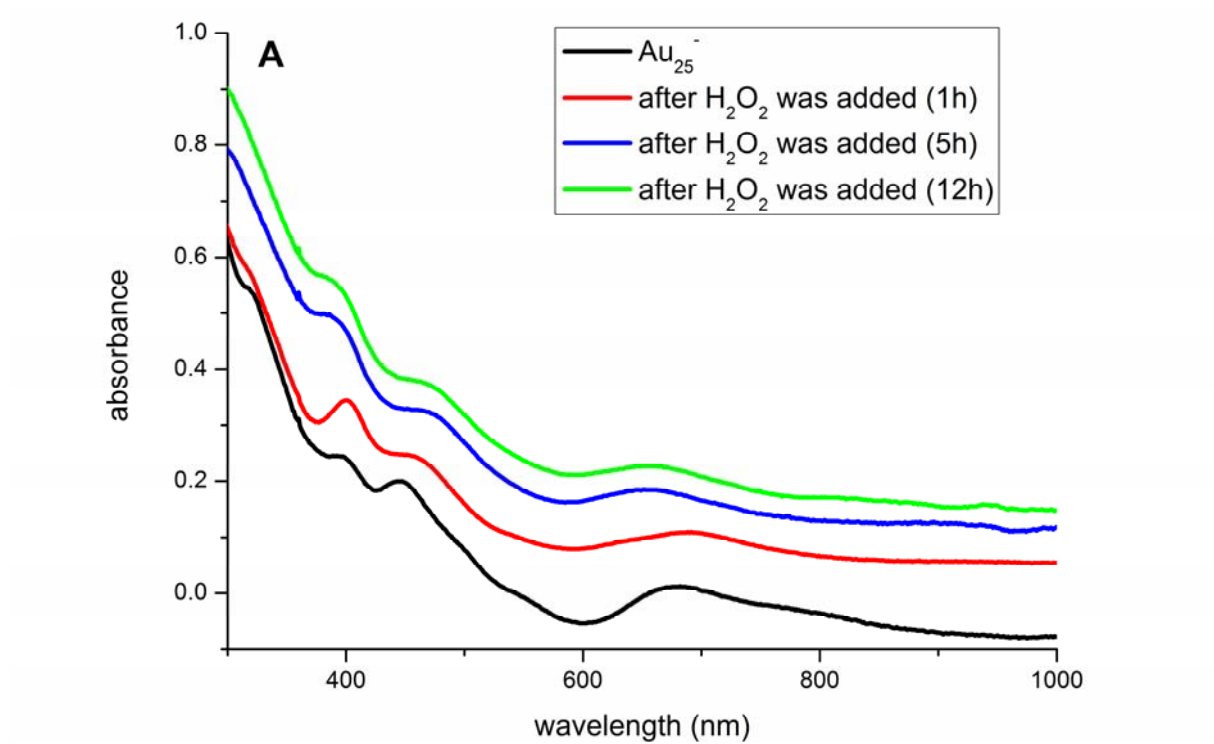



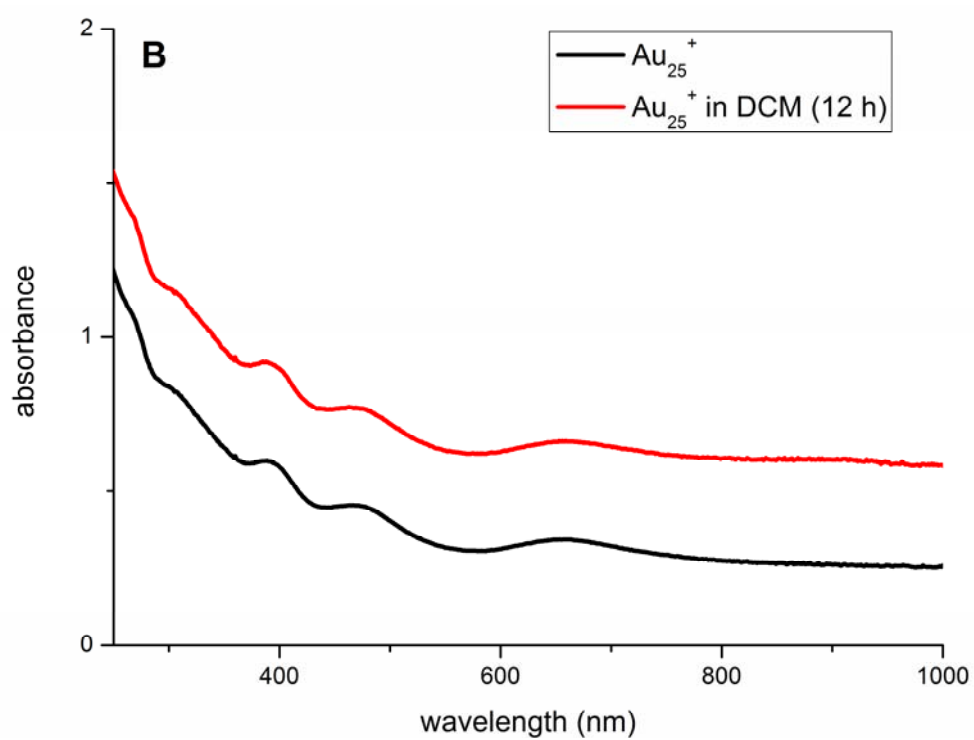

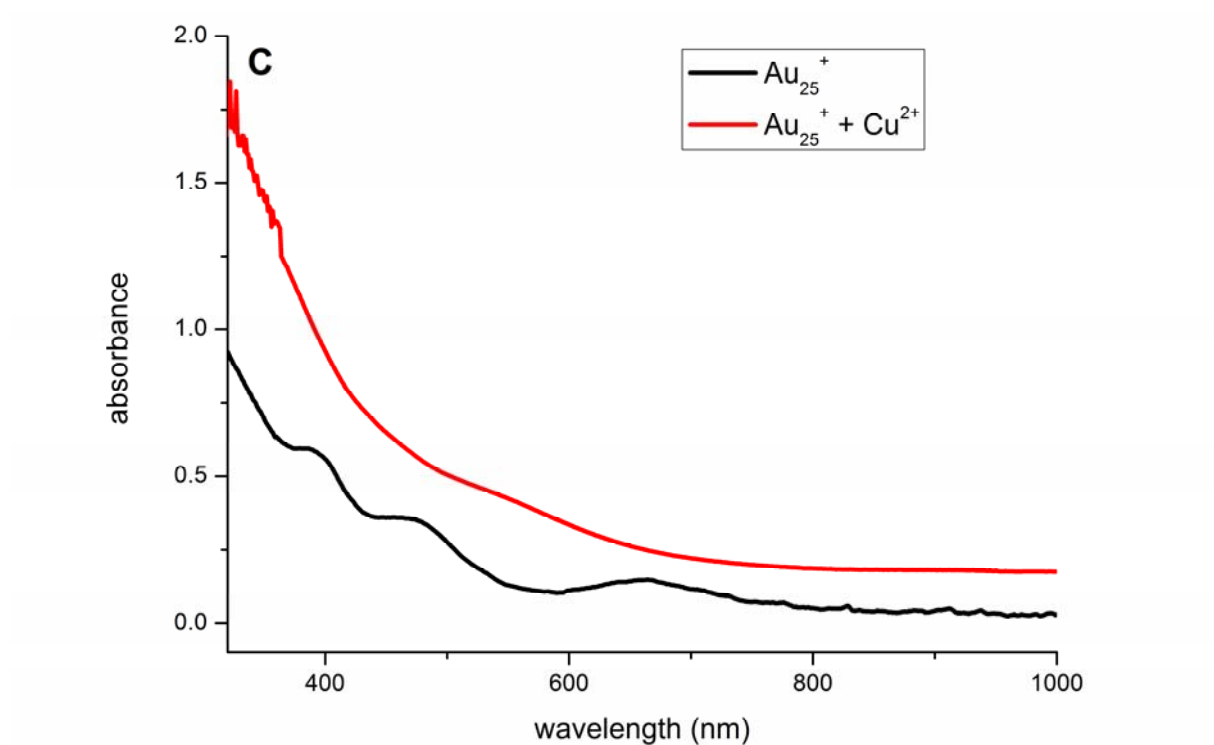

**Figure S6.** (A) Reaction of  $Au_{25}^{-}$  with  $H_2O_2$ ; (B) isolated  $Au_{25}^{+}$  (from  $Au_{25}-Cu^{2+}$  system) was stirred in DCM at room temperature for 12 h; (C) isolated  $Au_{25}^{+}$  and  $Cu(II)$  was stirred in DCM at room temperature for 12 h.

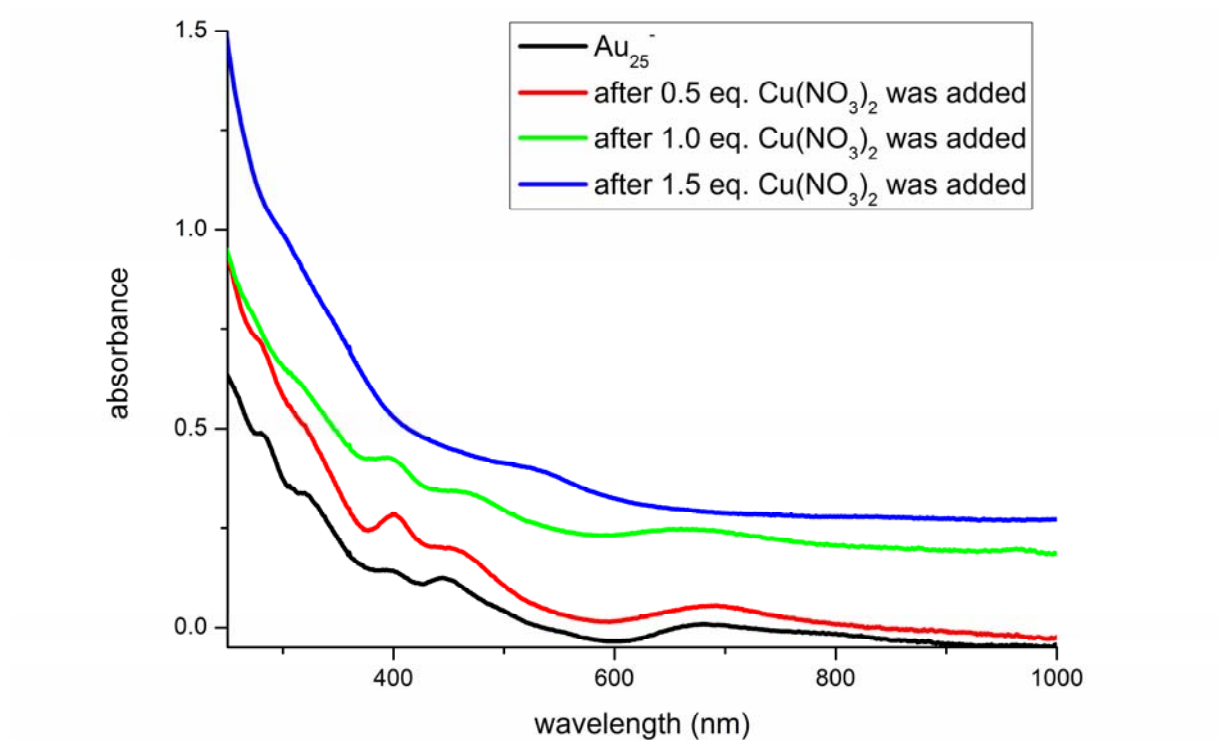

**Figure S7.** The spectral changes of  $\text{Au}_{25}^-$  with gradual addition of anhydrous cupric nitrate.

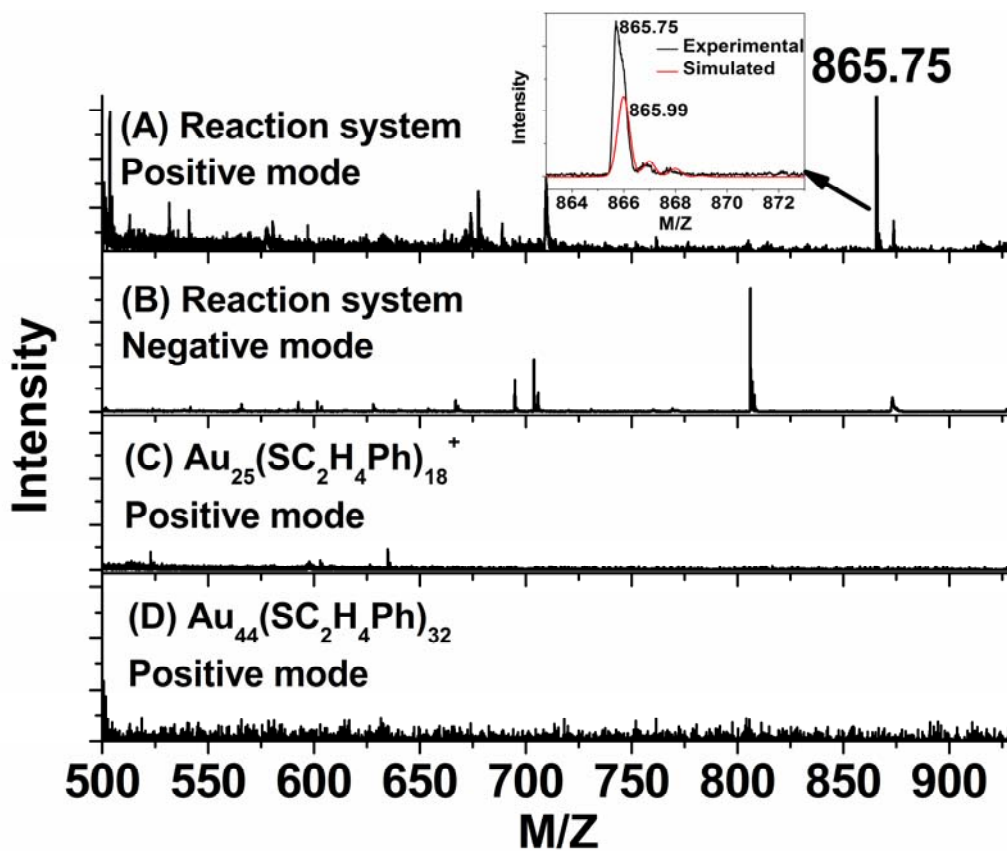

**Figure S8.** MALDI-TOF-MS spectra of the reaction system in positive ionization mode (A) or negative ionization mode (B),  $[\text{Au}_{25}(\text{SC}_2\text{H}_4\text{Ph})_{18}]^+$  in positive ionization mode (C), and purified  $\text{Au}_{44}(\text{SC}_2\text{H}_4\text{Ph})_{32}$  in positive ionization mode (D). (Inset) Comparison of simulated and experimental isotope patterns.

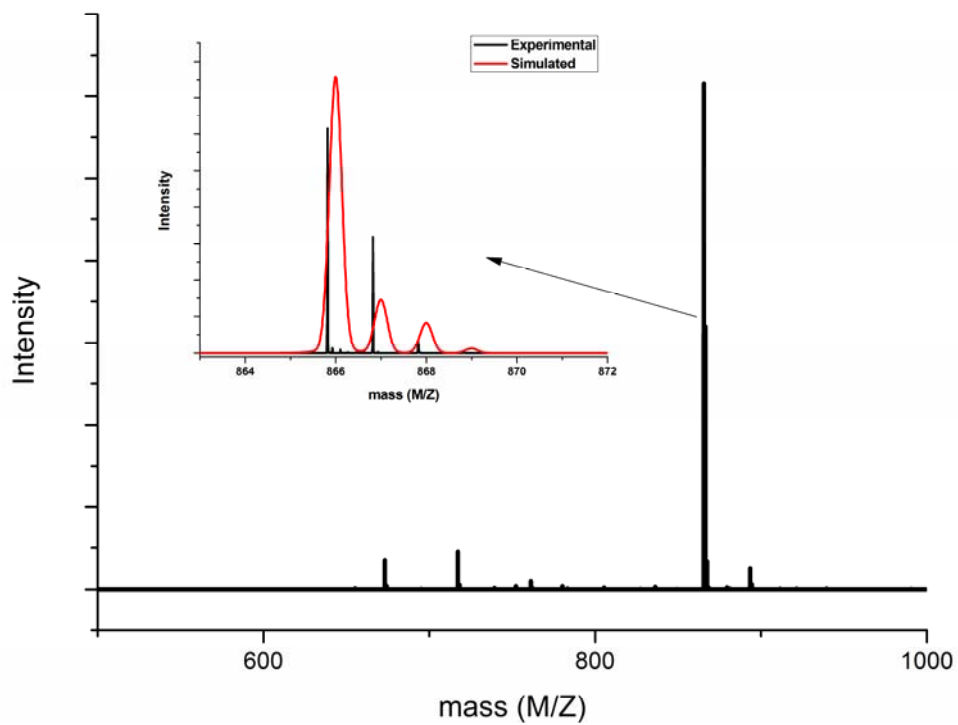

**Figure S9.** ESI-MS spectra of the reaction system. (Inset) Comparison of simulated and experimental isotope patterns.

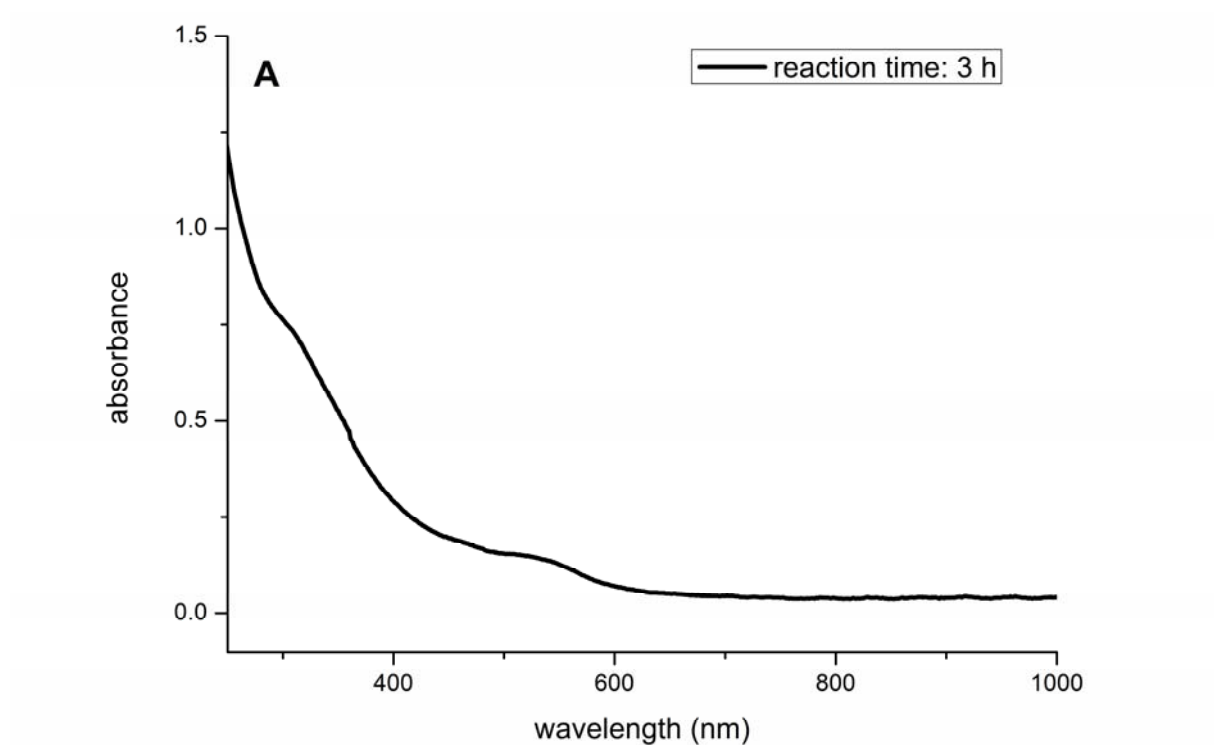

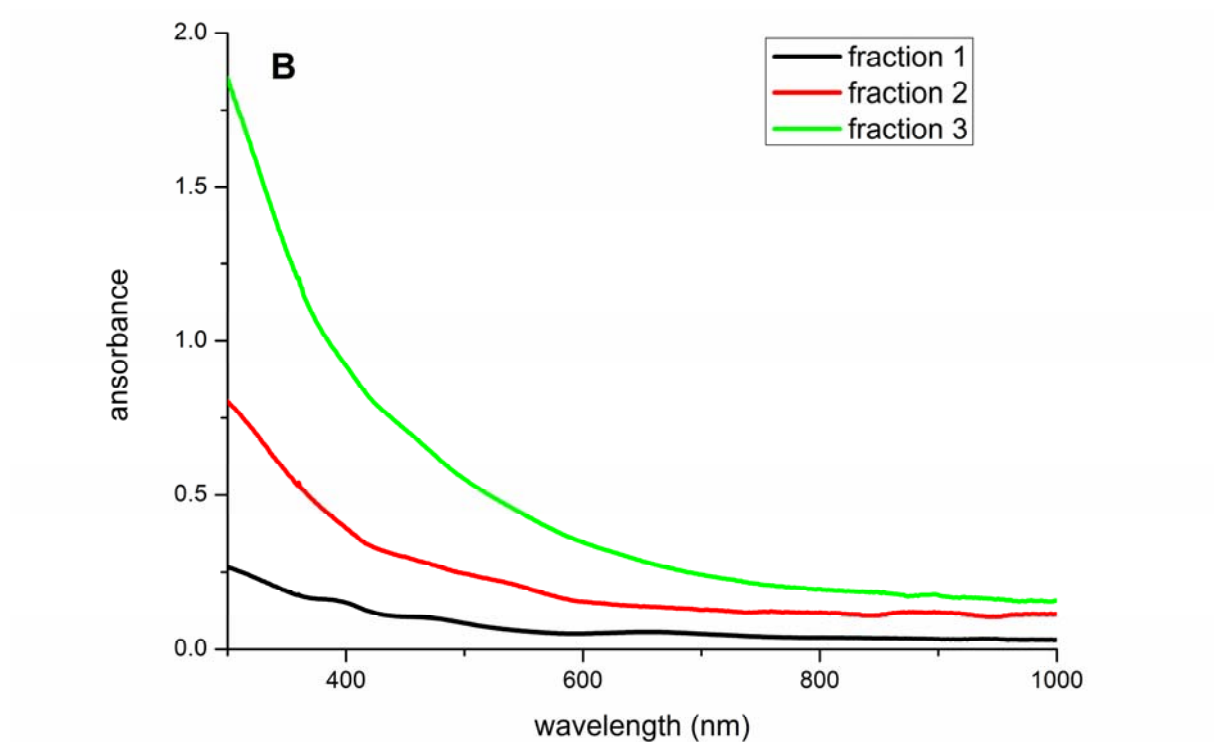

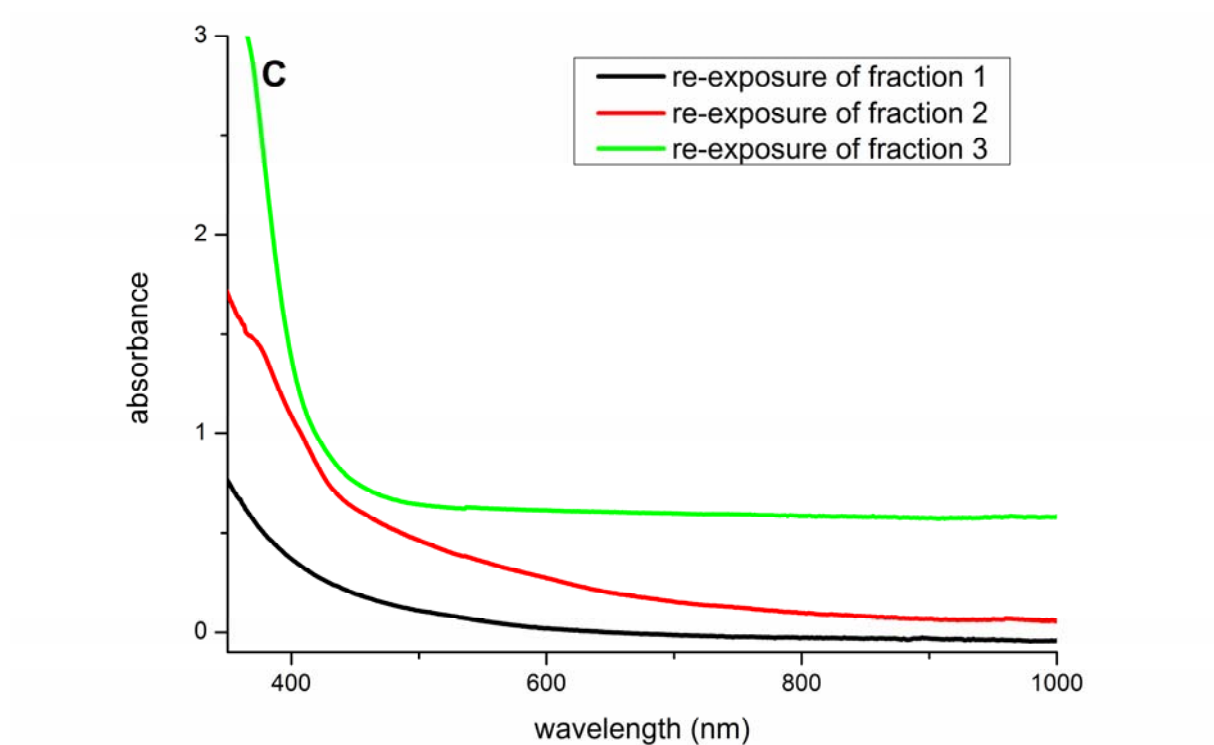

**Figure S10.** (A) UV-Vis spectrum of the reaction mixture after 3h. (B) UV-Vis spectrum of three fractions isolated by fractional precipitation. (c) UV-Vis spectrum of the three isolated fractions after re-exposure to the reaction conditions.



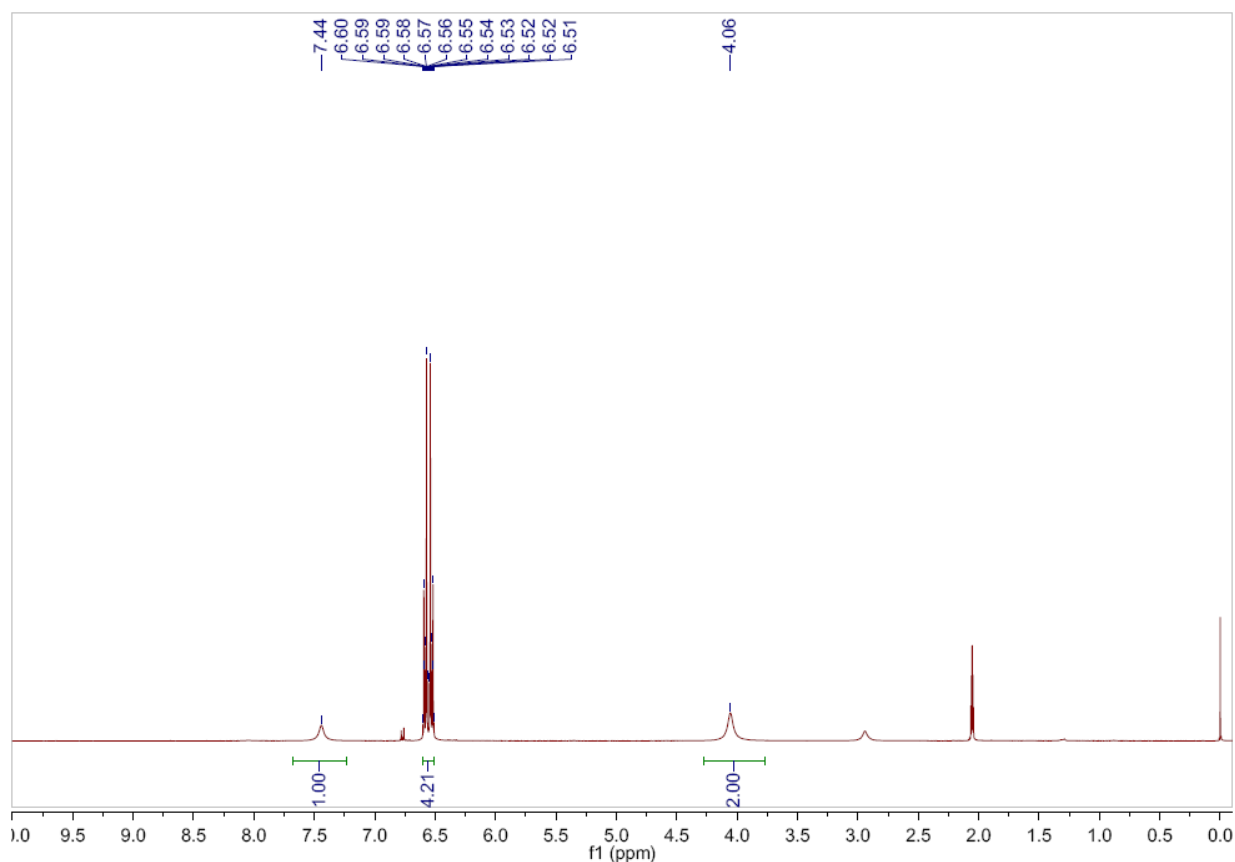

**Figure S11.**  $^1\text{H}$  NMR spectrum of 4-aminophenol.

**Table S3.** Recyclability of  $\text{Au}_{44}(\text{SC}_2\text{H}_4\text{Ph})_{32}$

| Entry | Number of cycles | Yield <sup>a</sup> (%) |
|-------|------------------|------------------------|
| 1     | 1                | 96                     |
| 2     | 2                | 92                     |
| 3     | 3                | 88                     |
| 4     | 4                | 88                     |
| 5     | 5                | 87                     |
| 6     | 6                | 86                     |

<sup>a</sup> Reaction conditions: 4-nitrophenol (69.5 mg, 0.5 mmol),  $\text{Au}_{44}(\text{SC}_2\text{H}_4\text{Ph})_{32}$  (1 mol%),  $\text{NaBH}_4$  (190 mg, 10 equivalents), THF (5.0 mL),  $\text{H}_2\text{O}$  (1.0 mL),  $25^\circ\text{C}$ . <sup>b</sup> Isolated yield.

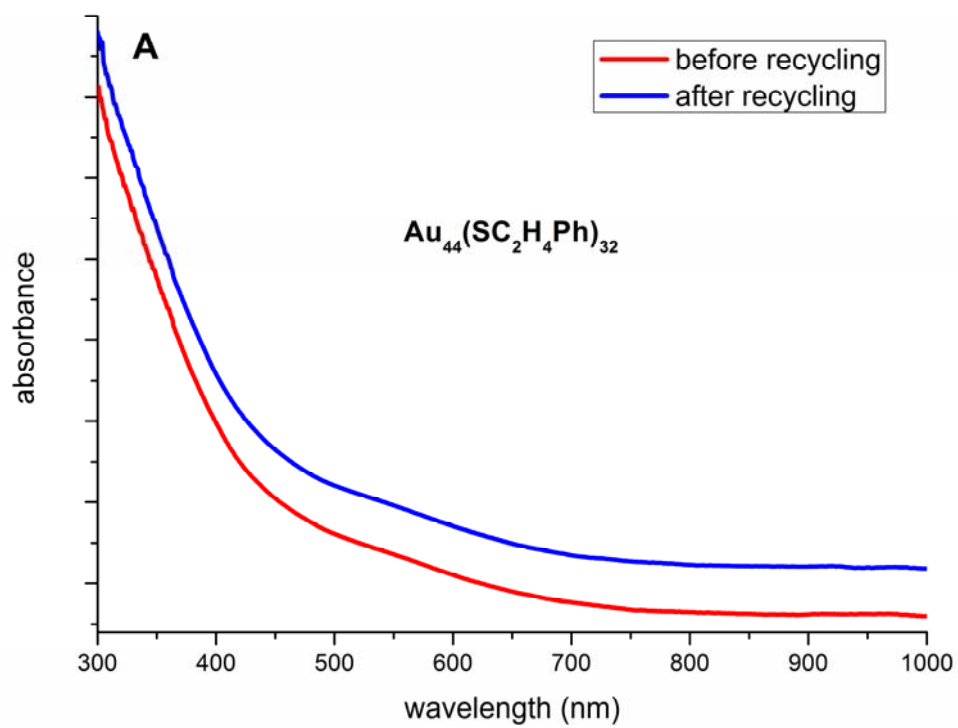

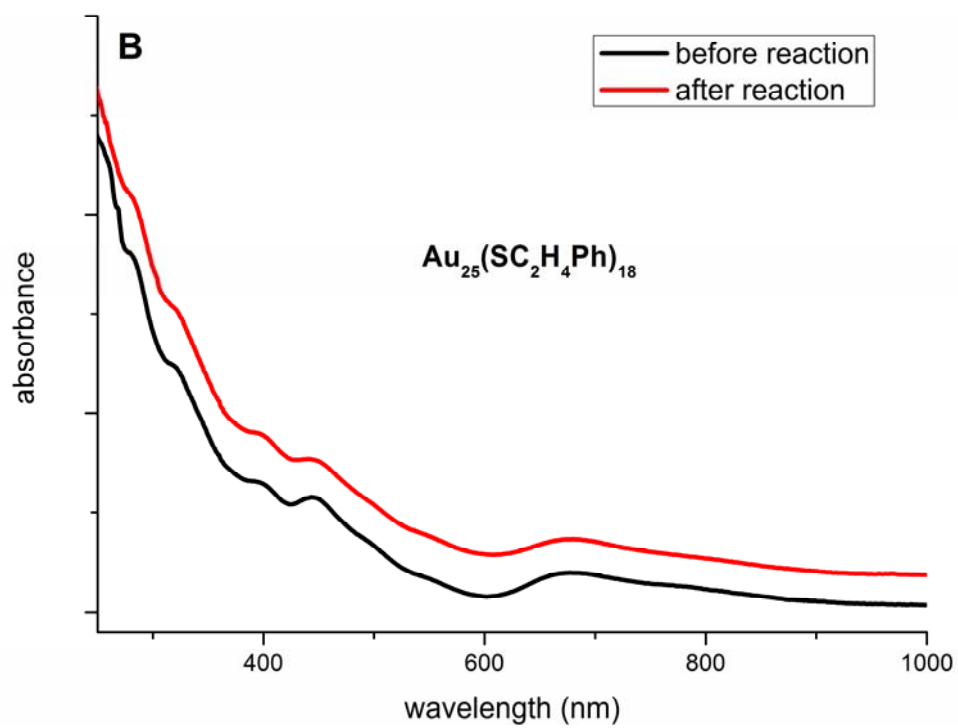

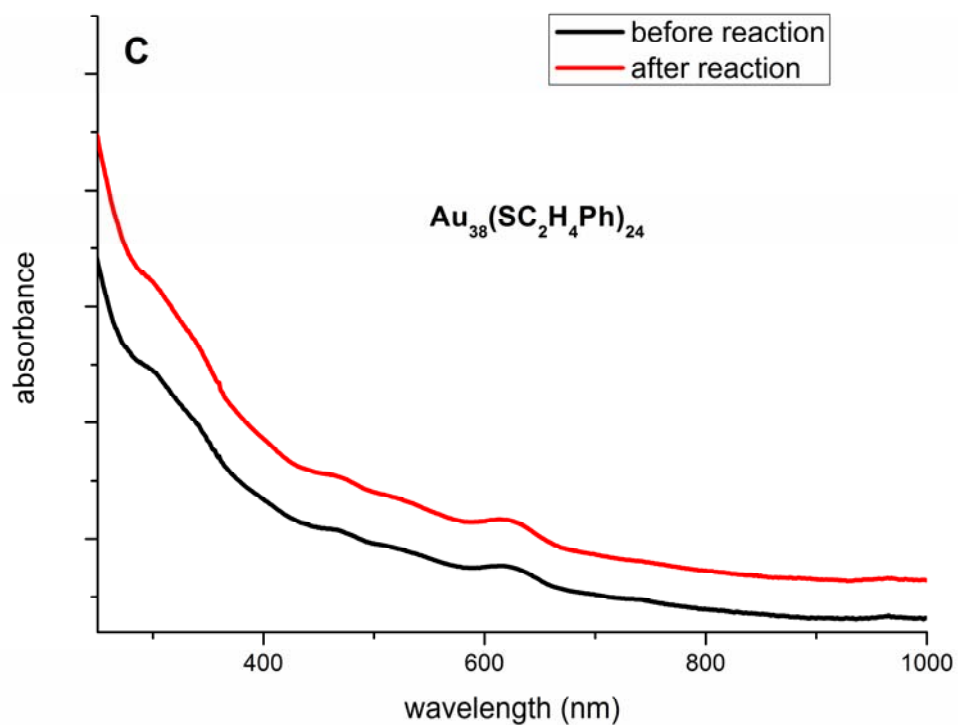

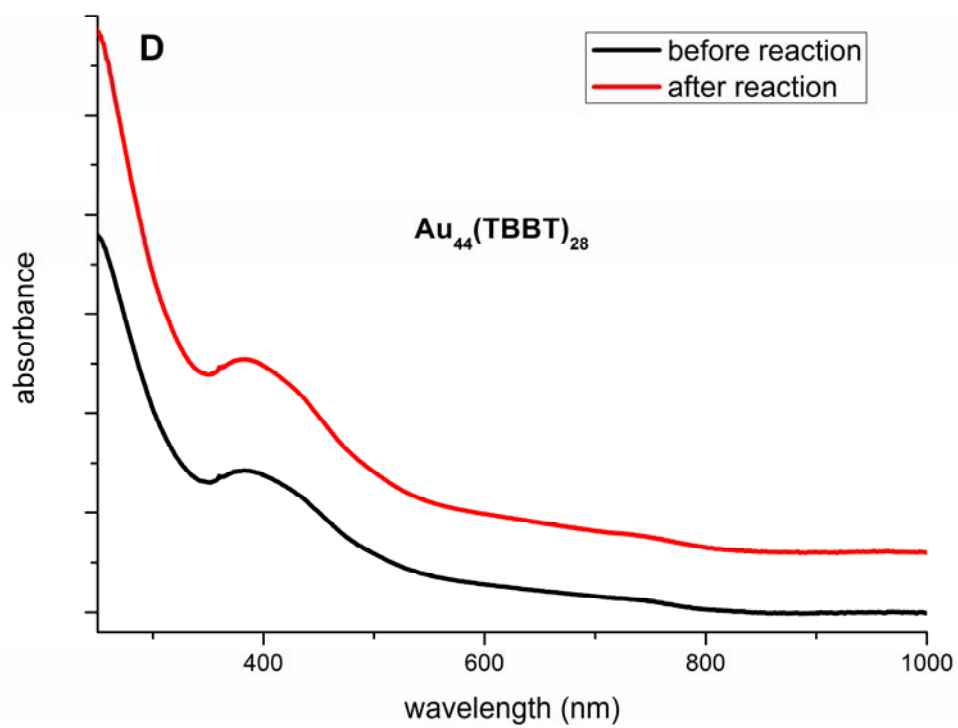

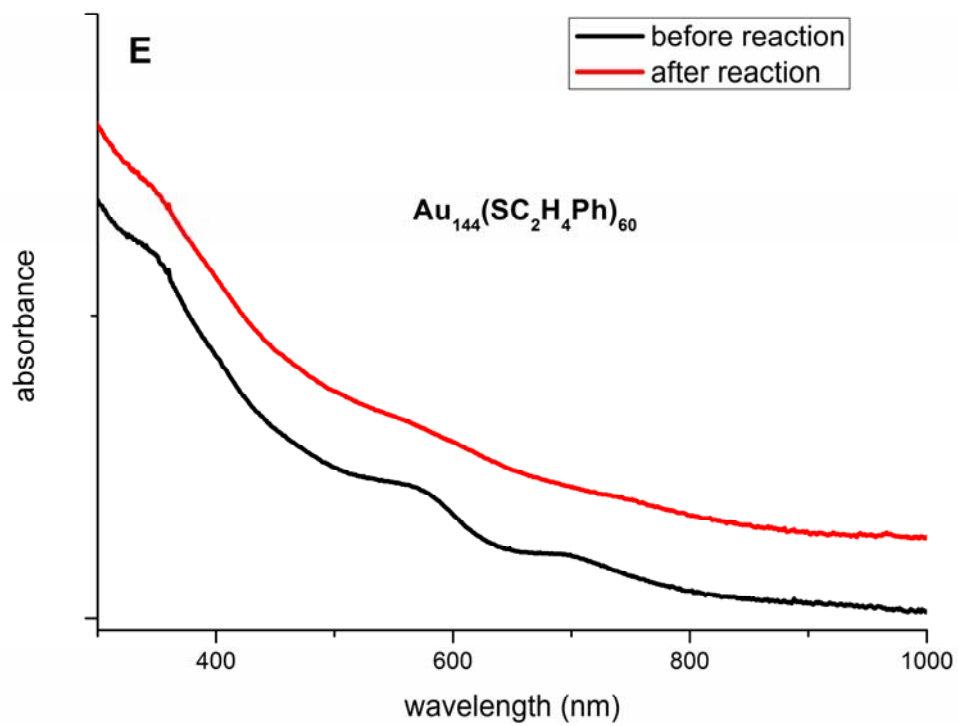

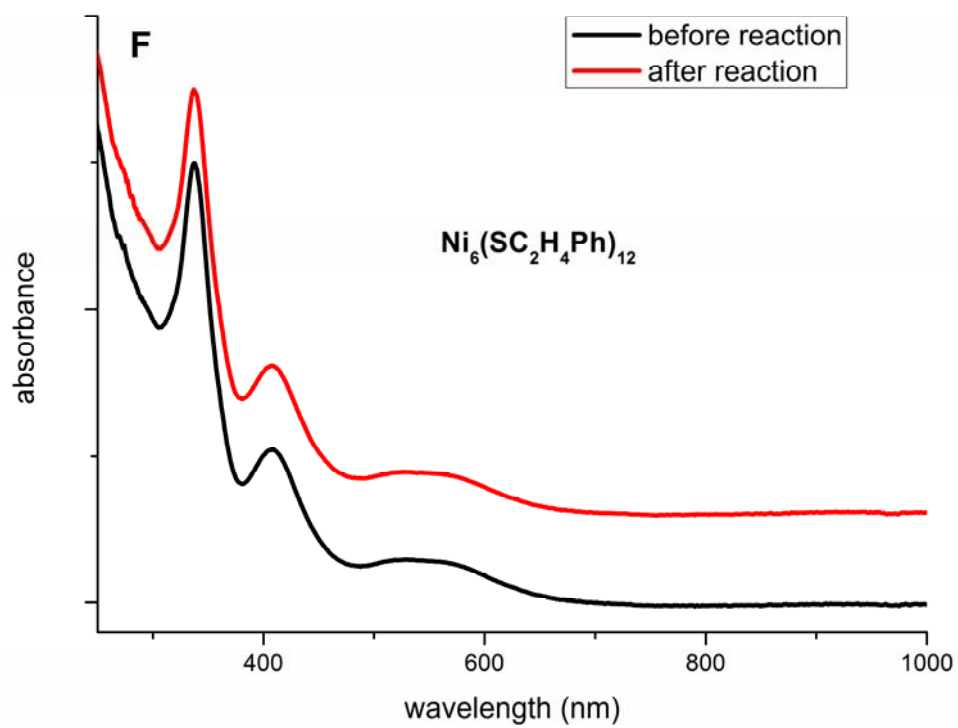

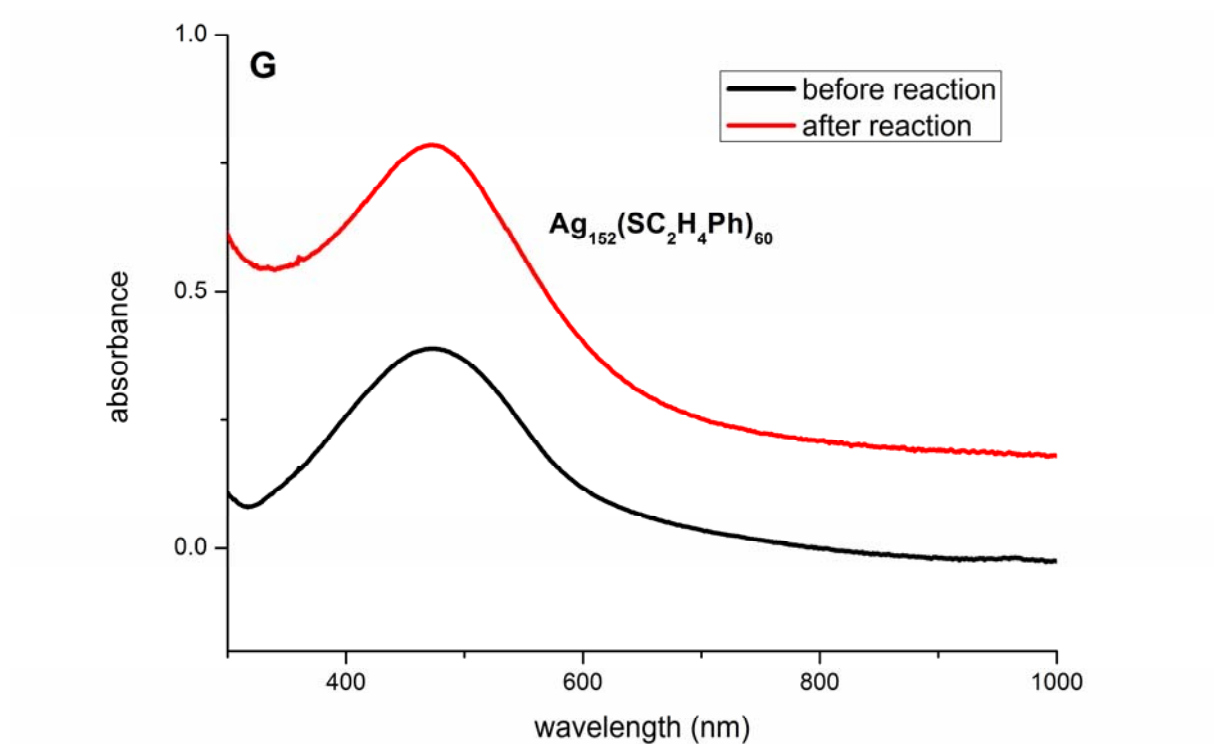



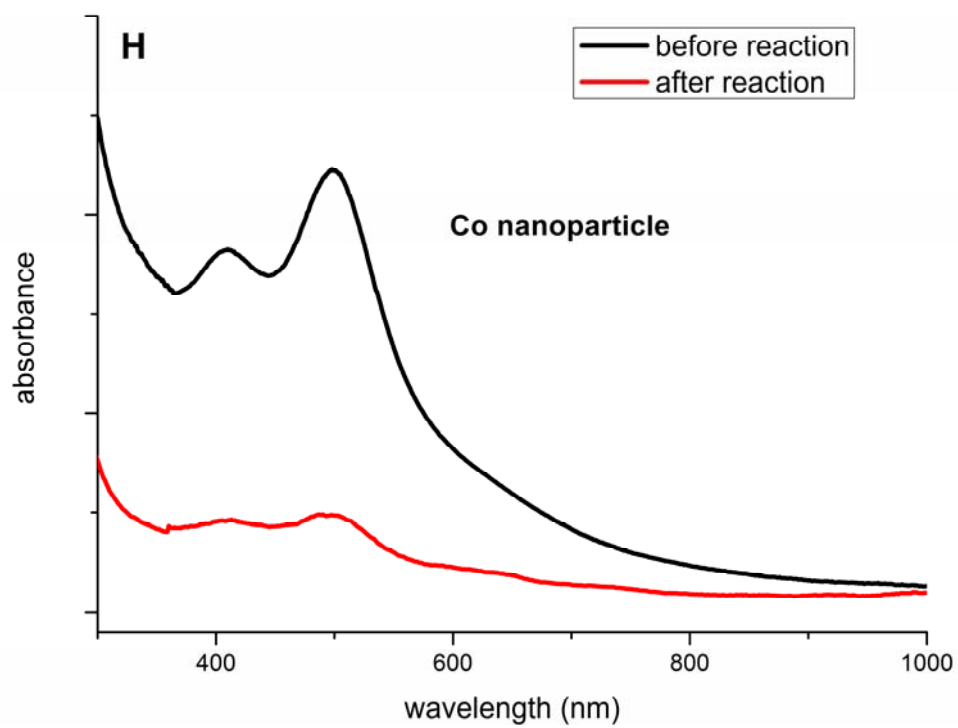

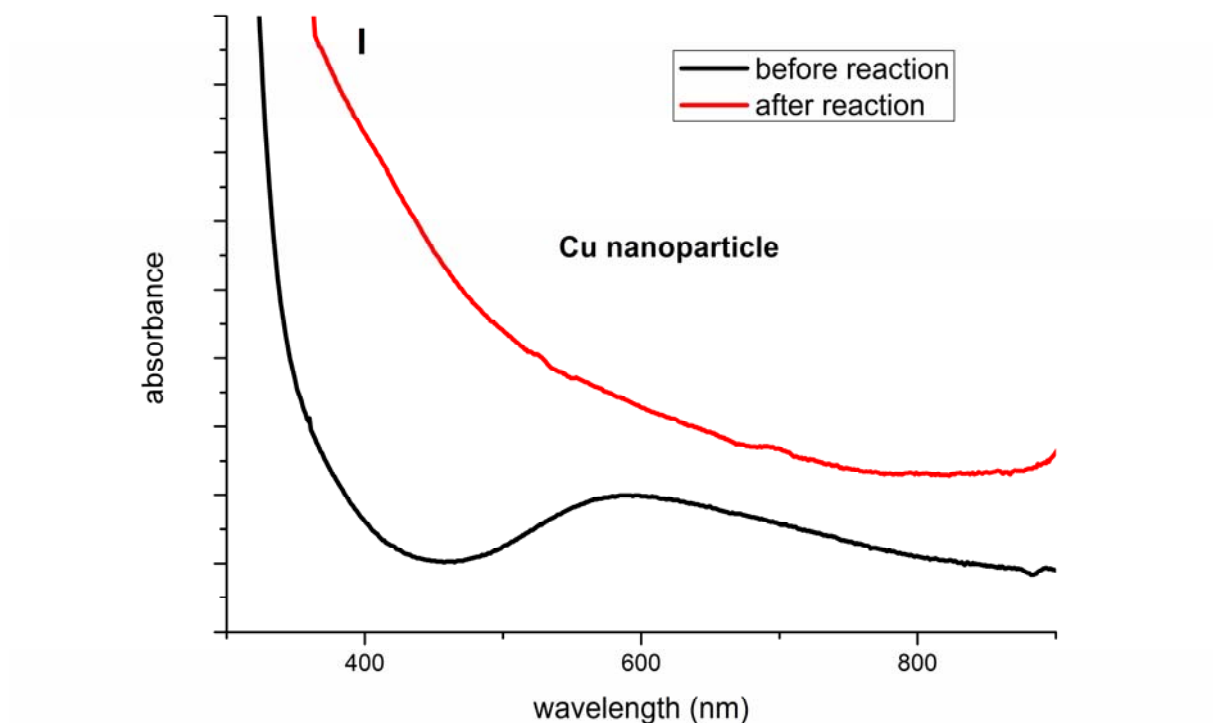

**Figure S12.** UV/Vis/NIR spectra of nanocatalysts before and after reaction. (A)  $\text{Au}_{44}(\text{SC}_2\text{H}_4\text{Ph})_{32}$ ; (B)  $\text{Au}_{25}(\text{SCH}_2\text{CH}_2\text{Ph})_{18}$ ; (C)  $\text{Au}_{38}(\text{SCH}_2\text{CH}_2\text{Ph})_{24}$ ; (D)  $\text{Au}_{44}(\text{TBBT})_{28}$ ; (E)  $\text{Au}_{144}(\text{SCH}_2\text{CH}_2\text{Ph})_{60}$ ; (F)  $\text{Ni}_6(\text{SC}_2\text{H}_4\text{Ph})_{12}$ ; (G)  $\text{Ag}_{152}(\text{SC}_2\text{H}_4\text{Ph})_{60}$ ; (H) Co nanoparticles; (I) Cu nanoparticles.

## References

- s1 Z. Wu, J. Suhan, R. Jin, *J. Mater. Chem.*, 2009, **19**, 622.
- s2 H. Qian, Y. Zhu, R. Jin, *ACS nano*, 2009, **3**, 3795.
- s3 C. Zeng, Y. Chen, G. Li, R. Jin, *Chem. Commun.*, 2014, **50**, 55.
- s4 H. Qian, R. Jin, *Chem. Mater.*, 2011, **23**, 2209.
- s5 M. Zhu, S. Zhou, C. Yao, L. Liao, Z. Wu, *Nanoscale*, 2014, **6**, 14195.
- s6 I. Chakraborty, A. Govindarajan, J. Erusappan, A. Ghosh, T. Pradeep, B. Yoon, R. L. Whetten, U. Landman, *Nano Lett.* 2012, **12**, 5861.
